# Supplementary material for: A phosphine-free molecularly-defined Ni(ii) complex in catalytic hydrogenation of CO2
Source: Royal Society of Chemistry journal article supplement (doi:10.1039/d4cc03054k), 2024-01-01
Supplement: d4cc03054k1.pdf [file d4cc03054k1.pdf]

# Electronic Supplementary Information (ESI)

## **A phosphine-free molecularly-defined Ni(II) complex in catalytic hydrogenation of CO<sub>2</sub>**

Ritu Bhardwaj<sup>a</sup> and Joyanta Choudhury<sup>a\*</sup>

<sup>a</sup>Organometallics & Smart Materials Laboratory, Department of Chemistry, Indian Institute of Science Education and Research Bhopal, Bhopal 462066, India.

E-mail: [joyanta@iiserb.ac.in](mailto:joyanta@iiserb.ac.in)

## I. General information

$^1\text{H}$  and  $^{13}\text{C}\{^1\text{H}\}$  NMR spectra were recorded on Bruker AVANCE III 400 500 and 700 MHz NMR spectrometers at 25 °C unless mentioned otherwise. Chemical shifts ( $\delta$ ) are expressed in ppm using the residual proton resonance of the solvent as an internal reference as applicable  $\text{D}_2\text{O}$ :  $\delta = 4.79$  ppm for  $^1\text{H}$  spectra;  $\text{CD}_3\text{CN}$ : 1.94 ppm for  $^1\text{H}$  spectra;  $\text{DMSO-d}_6$ : 2.50 ppm.  $\text{CO}_2$  (purity 99.999%) and  $\text{H}_2$  (purity 99.999%) gases were purchased from INOX Air Products Pvt. Ltd. Single crystal X-ray diffraction measurements were performed with Bruker APEX-II CCD instrument. The Solvents utilized were dried manually. TMG and DBU was purchased from commercial suppliers and used without further purification. Deuterated solvents were purchased from CIL (Cambridge Isotope Laboratory).

## II. Synthesis of the $[\text{CNCNi}]$ complex

(a) Synthesis of ligand **L**, 3,6-Di-tert-butyl-1,8-bis(3-methylimidazolium)-carbazole diiodide. The ligand **L** was prepared according to literature procedure.<sup>S1,S2</sup>

$^1\text{H}$  NMR (500 MHz,  $\text{DMSO-d}_6$ , 298 K):  $\delta$  1.46 (s, 18H), 4.00 (s, 6H), 7.75 (s, 2H), 8.05 (d, 2H,  $^3J(\text{HH})$  3.0 Hz), 8.24 (d,  $^3J(\text{HH})$  3.0 Hz, 2H), 8.64 (s, 2H), 9.74 (s, 2H), 11.43 (s, 1H).

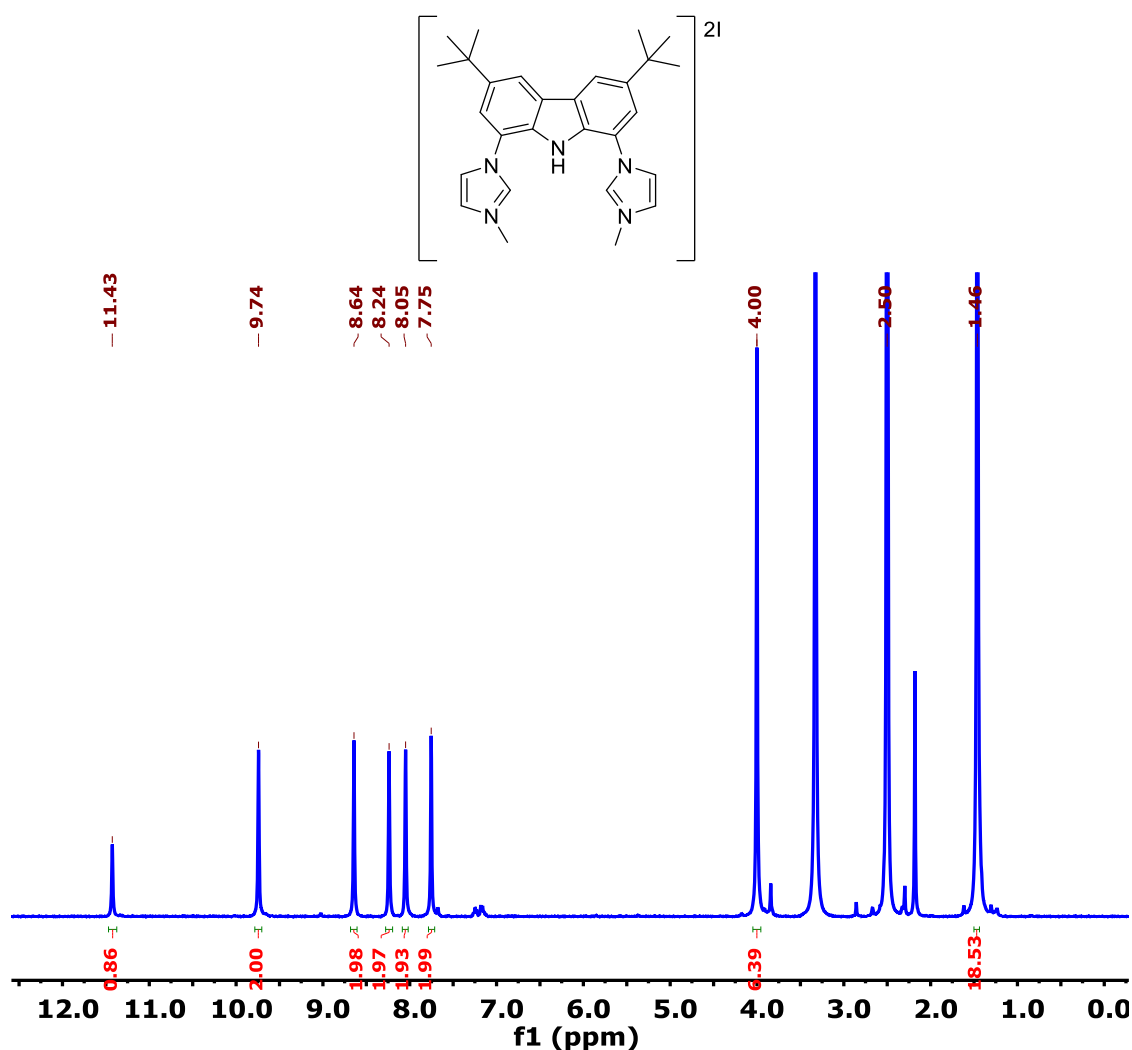

Figure S1.  $^1\text{H}$  NMR spectrum of **L** in  $\text{DMSO-d}_6$ .

(b) Synthesis of  $[\text{CNCNi}]$

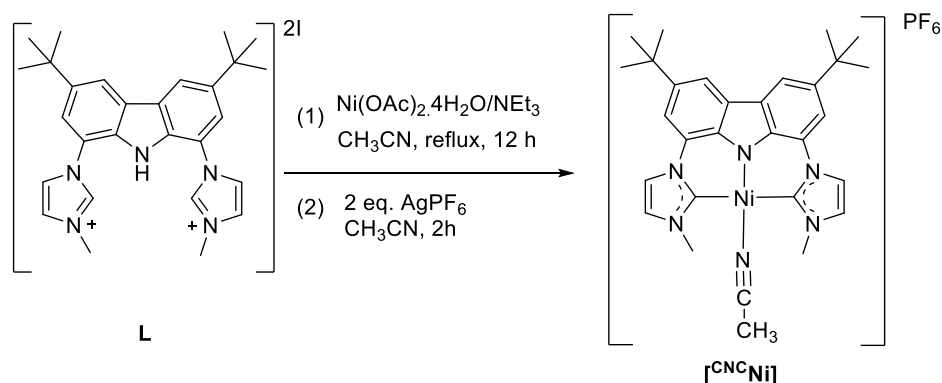

Ligand **L** (1.00 g, 1.44 mmol) was dissolved in acetonitrile (5 mL) and heated and stirred at 60 °C. 1.48 mL of triethylamine (1.07 g, 10.6 mmol) was added to the reaction mixture, followed by addition of 0.40 g (1.61 mmol) of  $\text{Ni}(\text{OAc})_2 \cdot 4\text{H}_2\text{O}$ . Upon refluxing overnight and then filtering through celite a brown solution was obtained. A brown colored residue was obtained upon solvent evaporation which was washed with water.<sup>S3</sup> 200 mg of the product obtained was dissolved in acetonitrile and this was followed by the addition of  $\text{AgPF}_6$  (2 eq.) to the solution. The suspension was stirred at room temperature for 2 hours and then celite filtered. Recrystallization from acetonitrile hexane mixture afforded the  $[\text{CNCNi}]$  complex (150 mg, 0.25 mmol) as a brown solid. Yield = 65 %.  $^1\text{H}$  NMR (700 MHz,  $\text{CD}_3\text{CN}$ , 298 K, ppm):  $\delta$  1.52 (s, 18H,  $\text{C}(\text{CH}_3)_3$ ), 1.93 (s, 3H,  $\text{CH}_3\text{CN}$ ), 3.63 (s, 6H,  $\text{N}-\text{CH}_3$ ), 7.22 (s, 2H), 7.68 (s, 2H), 7.94 (d, 2H), 8.20 (d, 2H).  $^{13}\text{C}$  NMR (700 MHz,  $\text{CD}_3\text{CN}$ , 298 K, ppm): 156.46, 142.27, 134.60, 127.91, 127.04, 123.39, 118.26, 116.02, 111.10. HRMS (ESI, positive ion): 496.2018 (calcd 496.2006 for  $[\text{C}_{28}\text{H}_{32}\text{N}_5\text{Ni}]$ )

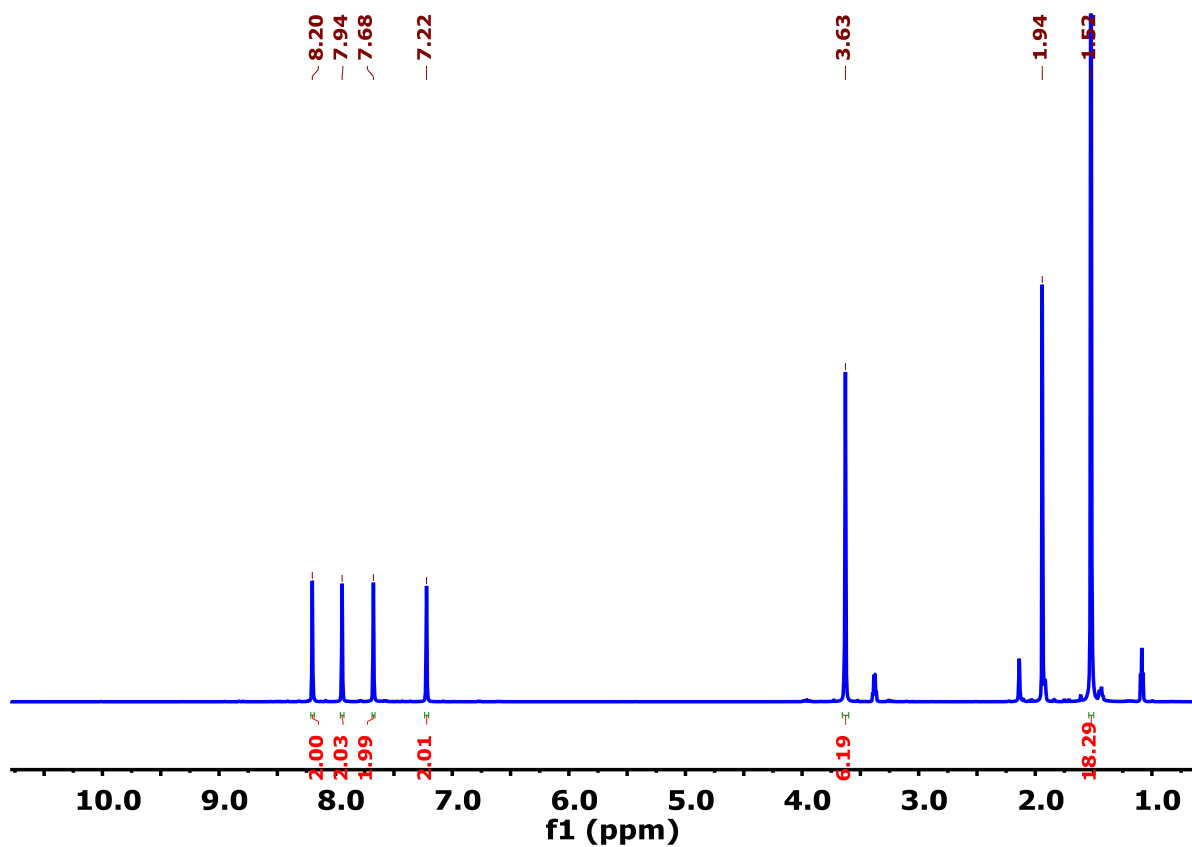

Figure S2.  $^1\text{H}$  NMR spectrum of  $[\text{CNCNi}]$  in  $\text{CD}_3\text{CN}$ .

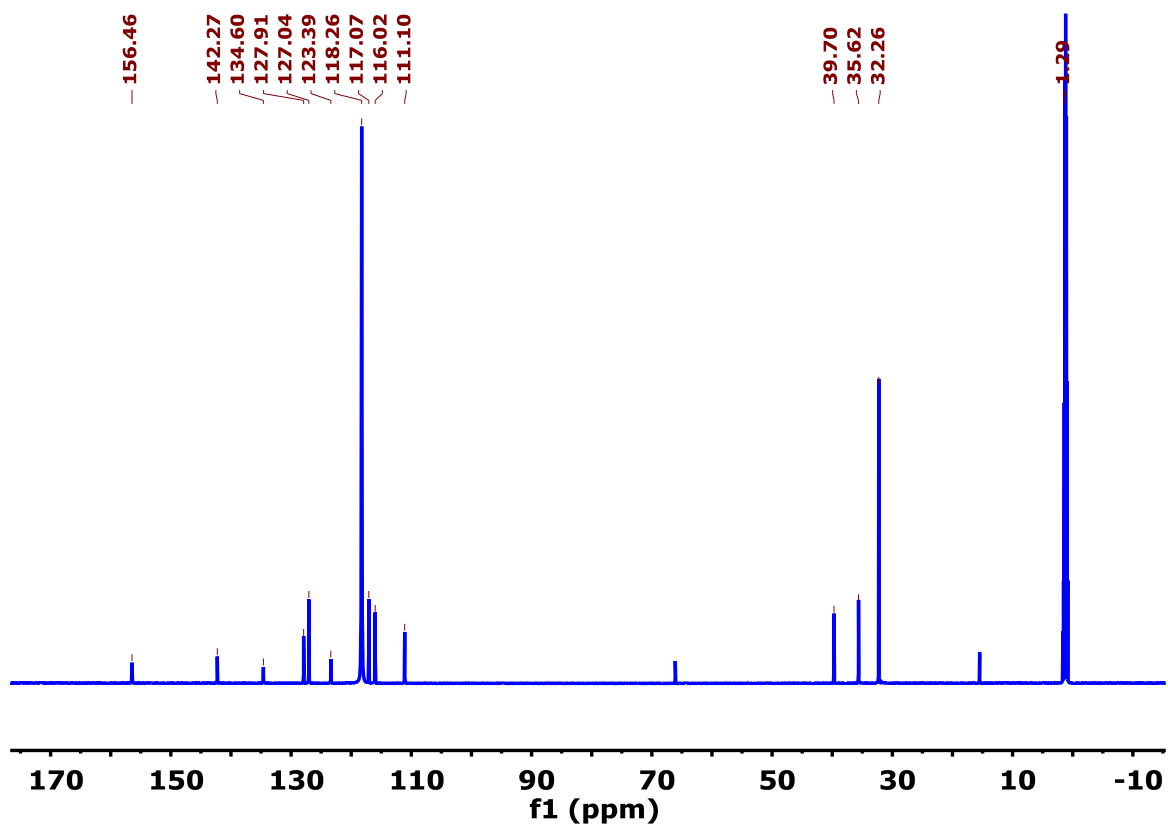

Figure S3.  $^{13}\text{C}$  NMR spectrum of  $[\text{CNCNi}]$  in  $\text{CD}_3\text{CN}$ .

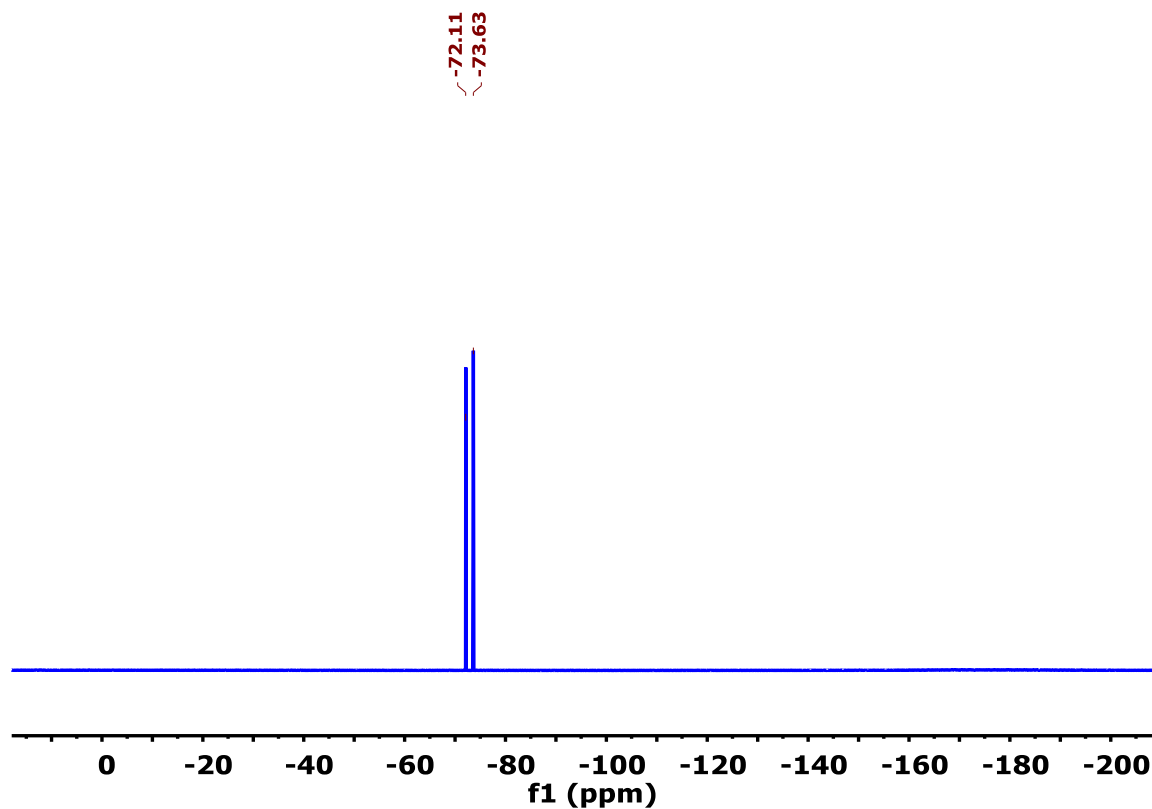

**Figure S4.**  $^{19}\text{F}$  NMR spectrum of  $[\text{CNCNi}]$  in  $\text{CD}_3\text{CN}$ .

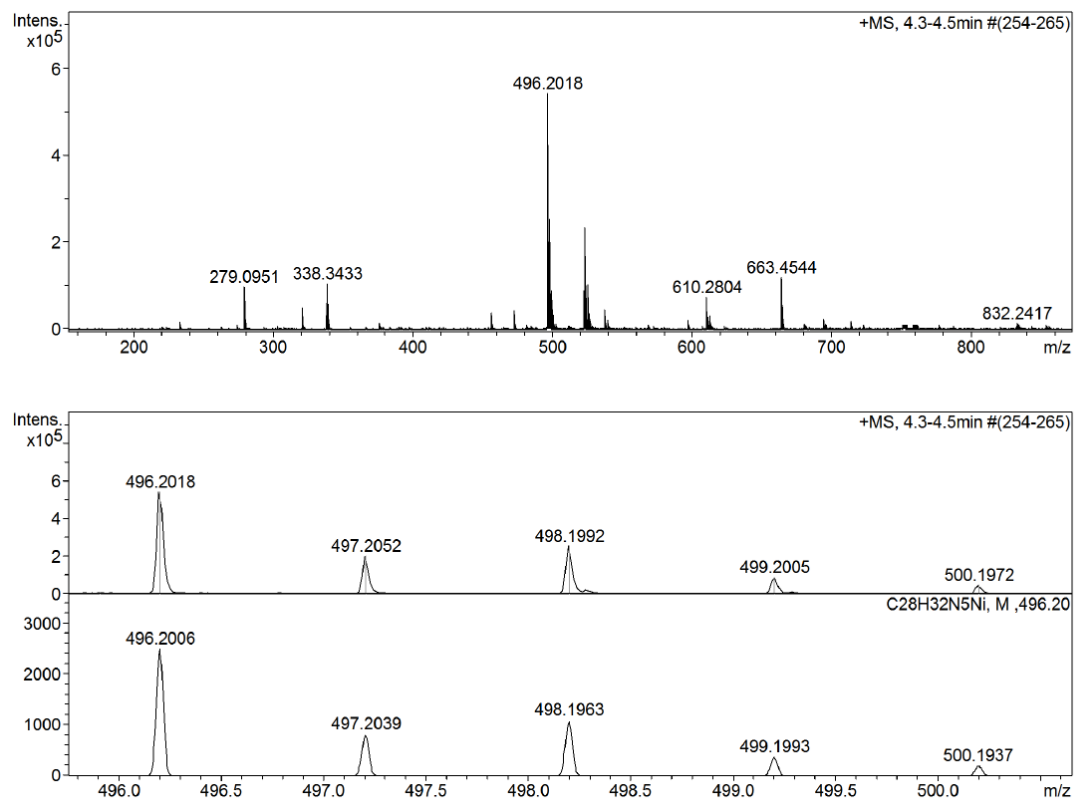

**Figure S5.** ESI-MS (positive mode) spectrum of  $[\text{CNCNi}]$ , 496.2018 (calcd 496.2006 for  $[\text{C}_{28}\text{H}_{32}\text{N}_5\text{Ni}^+]$ )

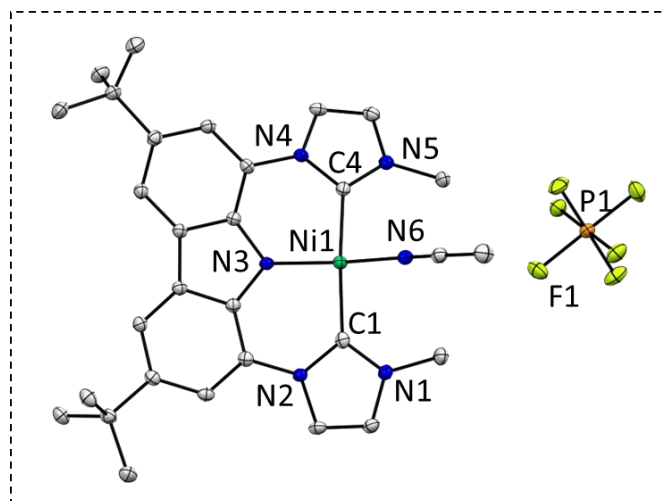

**Figure S6.** Molecular structure of  $[\text{CNCNi}]$  catalyst (50% probability level). Selected bond lengths ( $\text{\AA}$ ) and bond angles ( $^\circ$ ): Ni1-C1 = 1.936, Ni1-C4 = 1.943, Ni1-N3 = 1.832, Ni1-N6 = 1.868, C1-Ni1-N3 = 90.94, C4-Ni1-N3 = 90.95, C4-Ni1-C1 = 161.226 (H-atoms and one free  $\text{CH}_3\text{CN}$  molecule are omitted for clarity. The asymmetric unit consists of two identical molecules).

**Table S1 Crystal data and structure refinement for  $[\text{CNCNi}]$ .**

|                                               |                                                                             |
|-----------------------------------------------|-----------------------------------------------------------------------------|
| Identification code                           | F1                                                                          |
| Empirical formula                             | $\text{C}_{62}\text{H}_{73}\text{F}_{12}\text{N}_{13}\text{Ni}_2\text{P}_2$ |
| Formula weight                                | 1407.69                                                                     |
| Temperature/K                                 | 140.0                                                                       |
| Crystal system                                | monoclinic                                                                  |
| Space group                                   | $\text{P2}_1/\text{n}$                                                      |
| $a/\text{\AA}$                                | 21.7635(11)                                                                 |
| $b/\text{\AA}$                                | 13.5055(7)                                                                  |
| $c/\text{\AA}$                                | 22.7364(12)                                                                 |
| $\alpha/^\circ$                               | 90                                                                          |
| $\beta/^\circ$                                | 108.365(2)                                                                  |
| $\gamma/^\circ$                               | 90                                                                          |
| Volume/ $\text{\AA}^3$                        | 6342.5(6)                                                                   |
| Z                                             | 4                                                                           |
| $\rho_{\text{calc}}/\text{cm}^3$              | 1.474                                                                       |
| $\mu/\text{mm}^{-1}$                          | 0.731                                                                       |
| F(000)                                        | 2920.0                                                                      |
| Crystal size/ $\text{mm}^3$                   | $0.17 \times 0.05 \times 0.04$                                              |
| Radiation                                     | $\text{MoK}\alpha$ ( $\lambda = 0.71073$ )                                  |
| $2\Theta$ range for data collection/ $^\circ$ | 4.346 to 60.308                                                             |
| Index ranges                                  | $-30 \leq h \leq 30, -19 \leq k \leq 19, -32 \leq l \leq 30$                |
| Reflections collected                         | 104927                                                                      |
| Independent reflections                       | 18689 [ $R_{\text{int}} = 0.1326, R_{\text{sigma}} = 0.1053$ ]              |

Data/restraints/parameters 18689/0/839  
Goodness-of-fit on F<sup>2</sup> 1.011  
Final R indexes [I>=2σ (I)] R<sub>1</sub> = 0.0563, wR<sub>2</sub> = 0.1162  
Final R indexes [all data] R<sub>1</sub> = 0.1238, wR<sub>2</sub> = 0.1439  
Largest diff. peak/hole / e Å<sup>-3</sup> 0.60/-0.44

### III. Hydrogenation of CO<sub>2</sub> to formate

Nickel catalyst, base, additive in acetonitrile were added to the 25 mL pressure reactor. The reactor was then pressurized to the desired CO<sub>2</sub>:H<sub>2</sub> pressure and stirred at 120 °C for the desired reaction time. The reactor was then cooled to room temperature. The reaction vessel was then opened and a known amount of internal standard sodium trimethylsilylpropanesulfonate (DSS) was added. The reaction mixture was then analysed by <sup>1</sup>H and <sup>13</sup>C NMR spectroscopy using D<sub>2</sub>O as the deuterated solvent. Yield of product was determined by <sup>1</sup>H NMR spectroscopy.

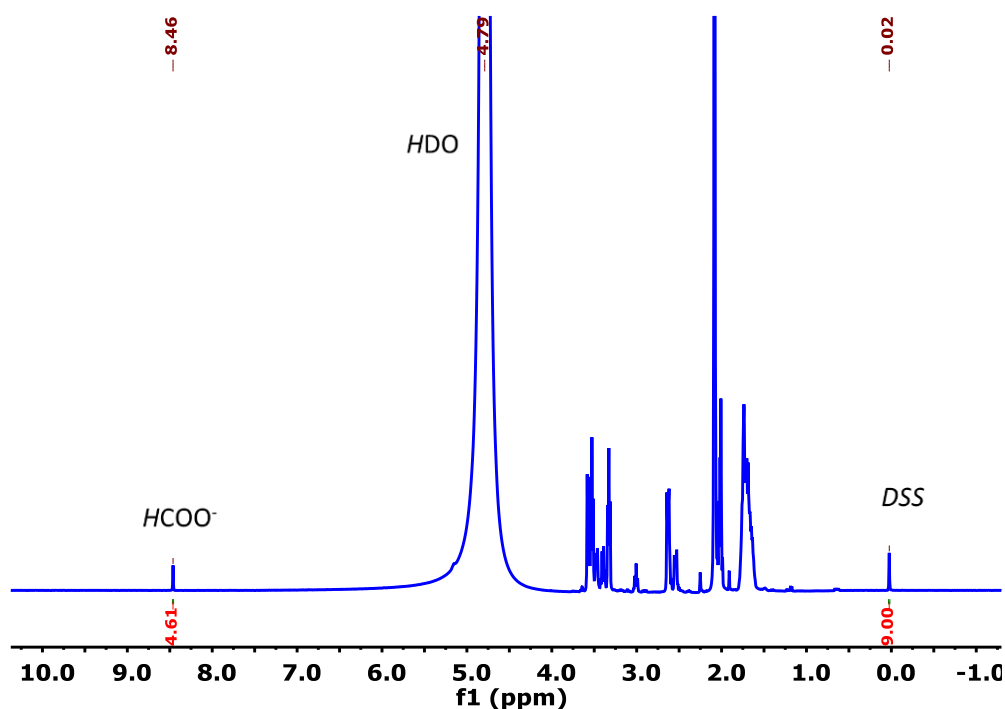

**Figure S7.** <sup>1</sup>H NMR spectrum of the reaction mixture obtained after the hydrogenation of CO<sub>2</sub> using [<sup>CNC</sup>Ni] cat. (4.5 μmol) and DBU (6.7 mmol) without adding any Lewis acid additive recorded in D<sub>2</sub>O. DSS (0.091 mmol, 20 mg) added as internal standard.

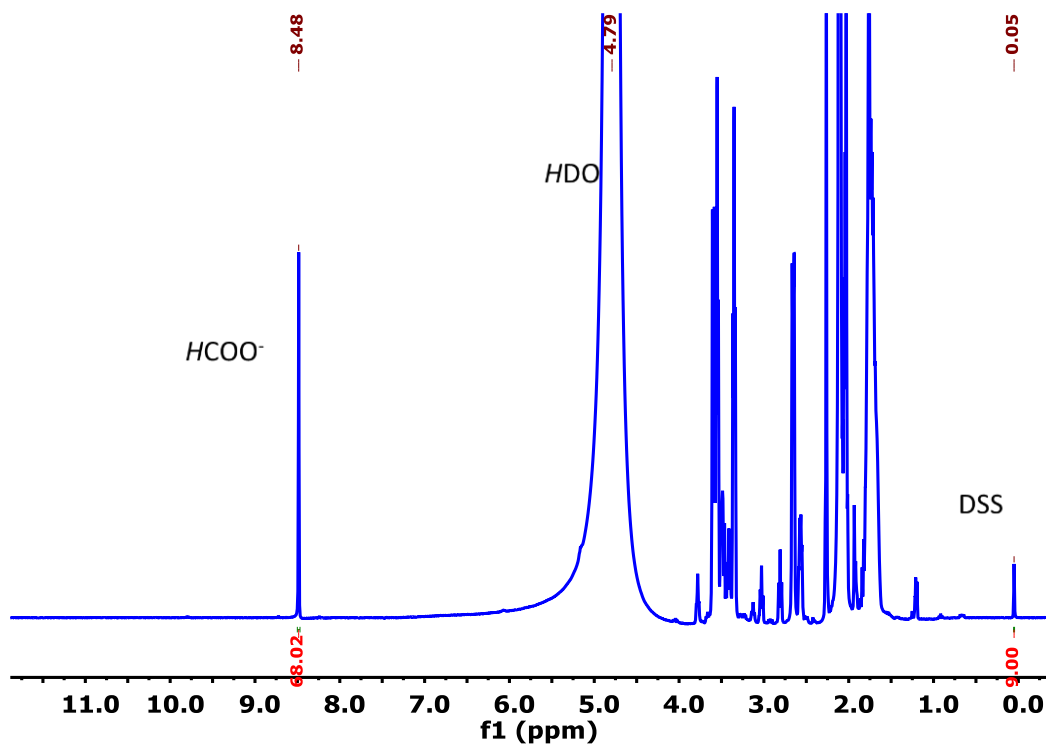

**Figure S8.**  $^1\text{H}$  NMR spectrum of the reaction mixture obtained after the hydrogenation of  $\text{CO}_2$  using  $[\text{C}^{\text{NC}}\text{Ni}]$  cat. ( $4.5\ \mu\text{mol}$ ) and DBU ( $6.7\ \text{mmol}$ ) with  $\text{Zn}(\text{OAc})_2$  ( $1.5\ \text{mmol}$ ) additive recorded in  $\text{D}_2\text{O}$ . DSS ( $0.091\ \text{mmol}$ ,  $20\ \text{mg}$ ) added as internal standard.

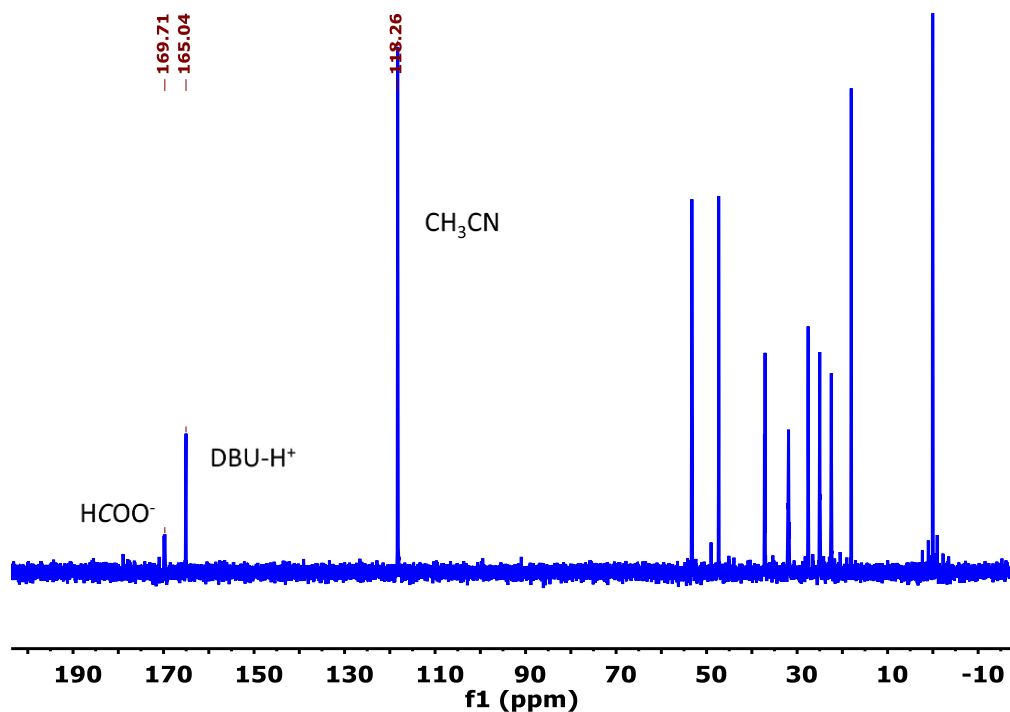

**Figure S9.**  $^{13}\text{C}\{^1\text{H}\}$  NMR spectrum of the reaction mixture obtained after the hydrogenation of  $\text{CO}_2$  using  $[\text{C}^{\text{NC}}\text{Ni}]$  cat. ( $4.5\ \mu\text{mol}$ ) and DBU ( $6.7\ \text{mmol}$ ) with  $\text{Zn}(\text{OAc})_2$  ( $1.5\ \text{mmol}$ ) additive recorded in  $\text{D}_2\text{O}$ . DSS ( $0.091\ \text{mmol}$ ,  $20\ \text{mg}$ ) added as internal standard.



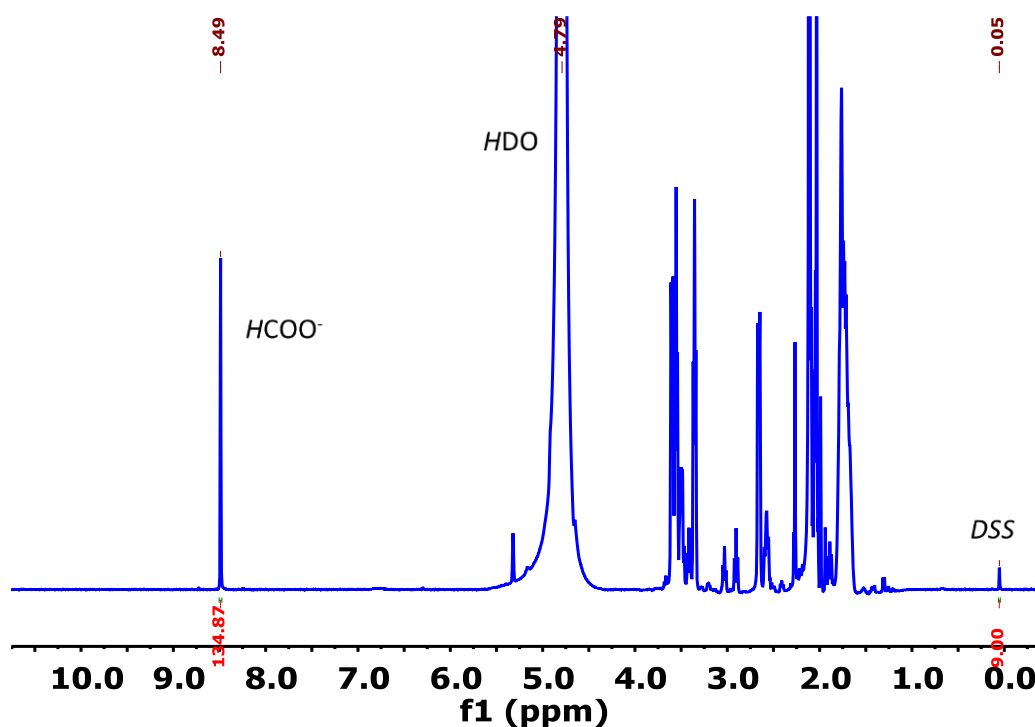

**Figure S10.** <sup>1</sup>H NMR spectrum of the reaction mixture obtained after the hydrogenation of CO<sub>2</sub> using [CNCNi] cat. (4.5 μmol) and DBU (13.4 mmol) with Zn(OAc)<sub>2</sub> (1.5 mmol) additive recorded in D<sub>2</sub>O. DSS (0.091 mmol, 20 mg) added as internal standard.

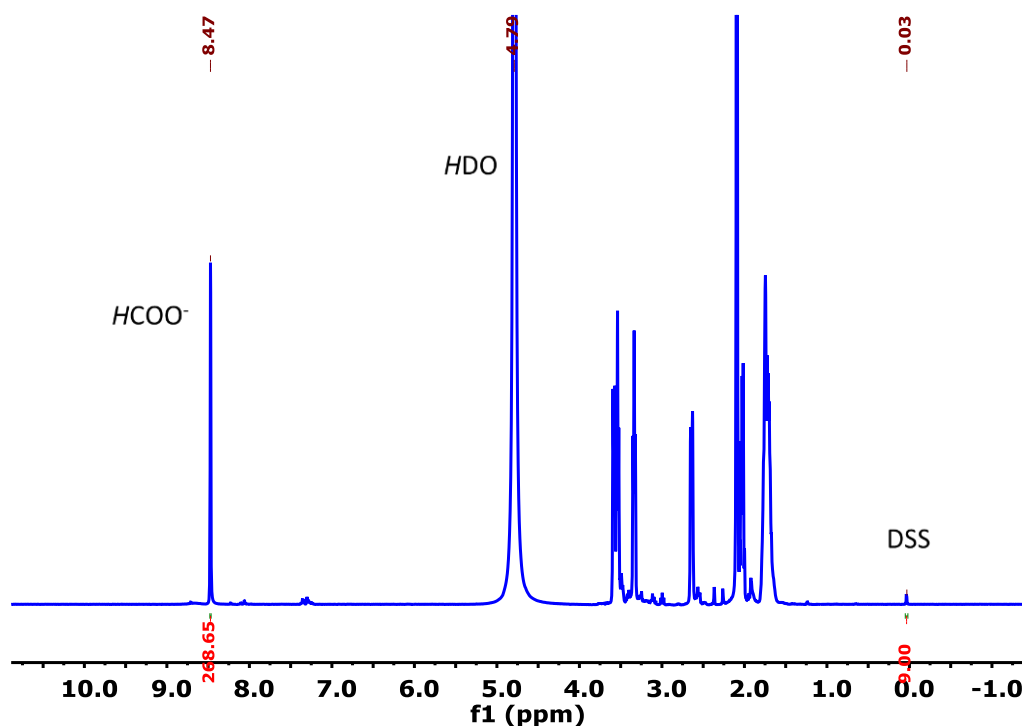

**Figure S11.** <sup>1</sup>H NMR spectrum of the reaction mixture obtained after the hydrogenation of CO<sub>2</sub> using [CNCNi] cat. (4.5 μmol) and DBU (26.8 mmol) with Zn(OAc)<sub>2</sub> (1.5 mmol) additive recorded in D<sub>2</sub>O. DSS (0.091 mmol, 20 mg) added as internal standard.

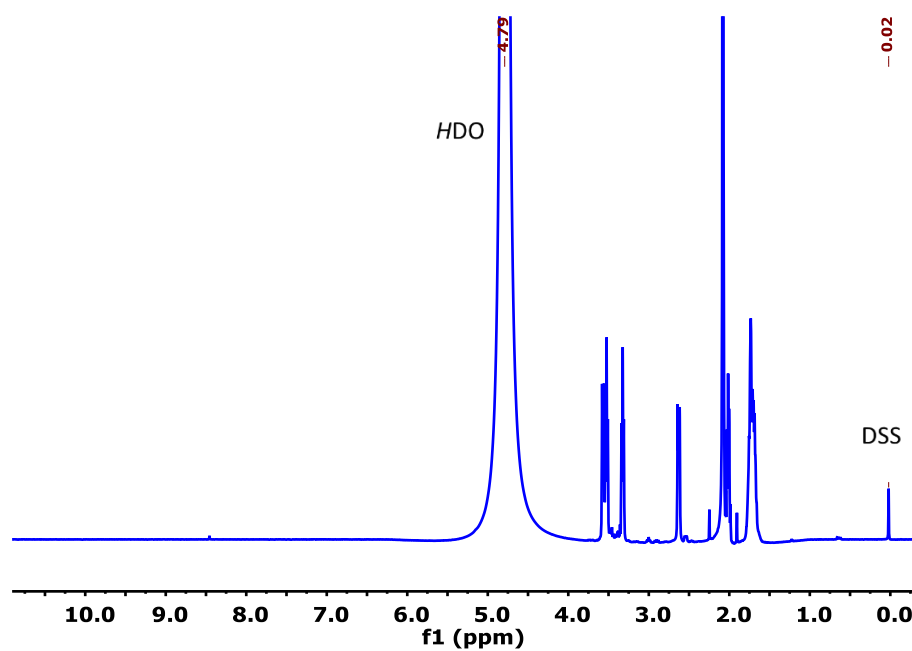

**Figure S12.**  $^1\text{H}$  NMR spectrum of the reaction mixture obtained after the in-situ hydrogenation of  $\text{CO}_2$  in the absence of  $[\text{CNCNi}]$  cat. ( $4.5 \mu\text{mol}$ ) using DBU ( $6.7 \text{ mmol}$ ) with  $\text{Zn}(\text{OAc})_2$  ( $1.5 \text{ mmol}$ ) additive recorded in  $\text{D}_2\text{O}$ . DSS ( $0.091 \text{ mmol}$ ,  $20 \text{ mg}$ ) added as internal standard.

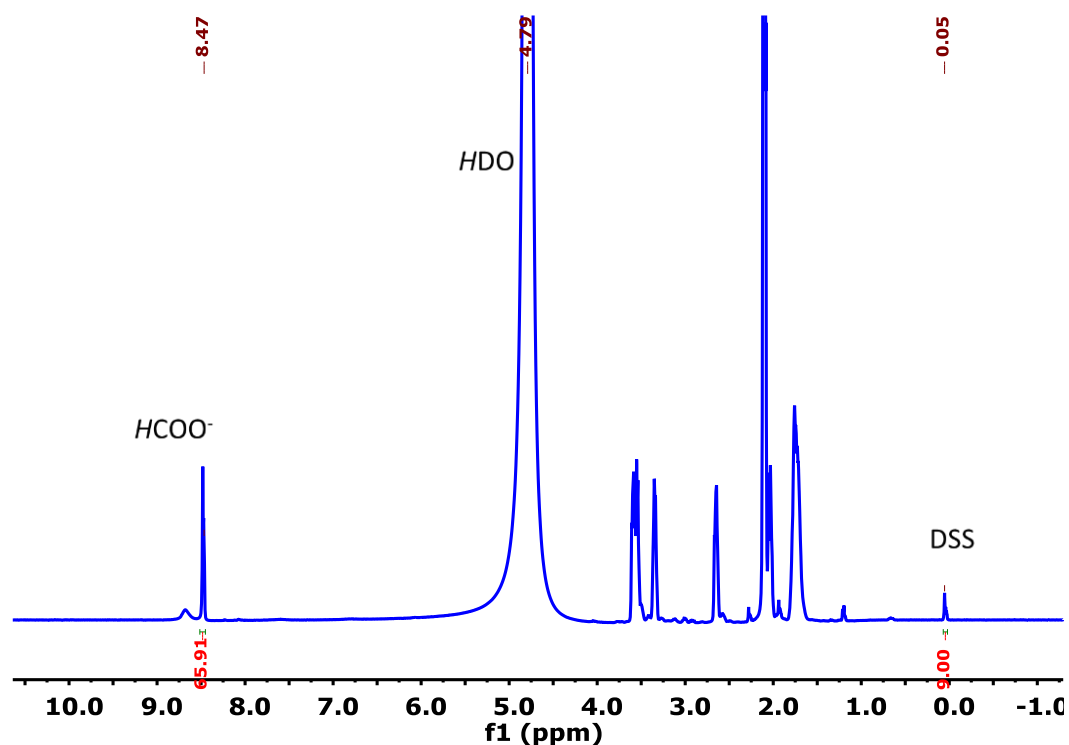

**Figure S13.**  $^1\text{H}$  NMR spectrum of the reaction mixture obtained after the in-situ hydrogenation of  $\text{CO}_2$  using  $[\text{CNCNi}]$  cat. ( $4.5 \mu\text{mol}$ ) and DBU ( $6.7 \text{ mmol}$ ) with  $\text{ZnCl}_2$  ( $1.5 \text{ mmol}$ ) additive recorded in  $\text{D}_2\text{O}$ . DSS ( $0.091 \text{ mmol}$ ,  $20 \text{ mg}$ ) added as internal standard.

#### IV. Plausible catalytic cycle

A plausible catalytic reaction mechanism is proposed based on previous literature reports (Fig S14).<sup>S4, S5</sup> CH<sub>3</sub>CN dissociation from the [CNCNi] complex and H<sub>2</sub> cleavage in the presence of base, DBU will result in the formation of the Ni-H species. The Ni-H species will then react with CO<sub>2</sub> to afford the Ni-formate species. The formate then dissociates and the base stabilized adduct, [DBUH<sup>+</sup>][HCOO<sup>-</sup>] is obtained as the product.

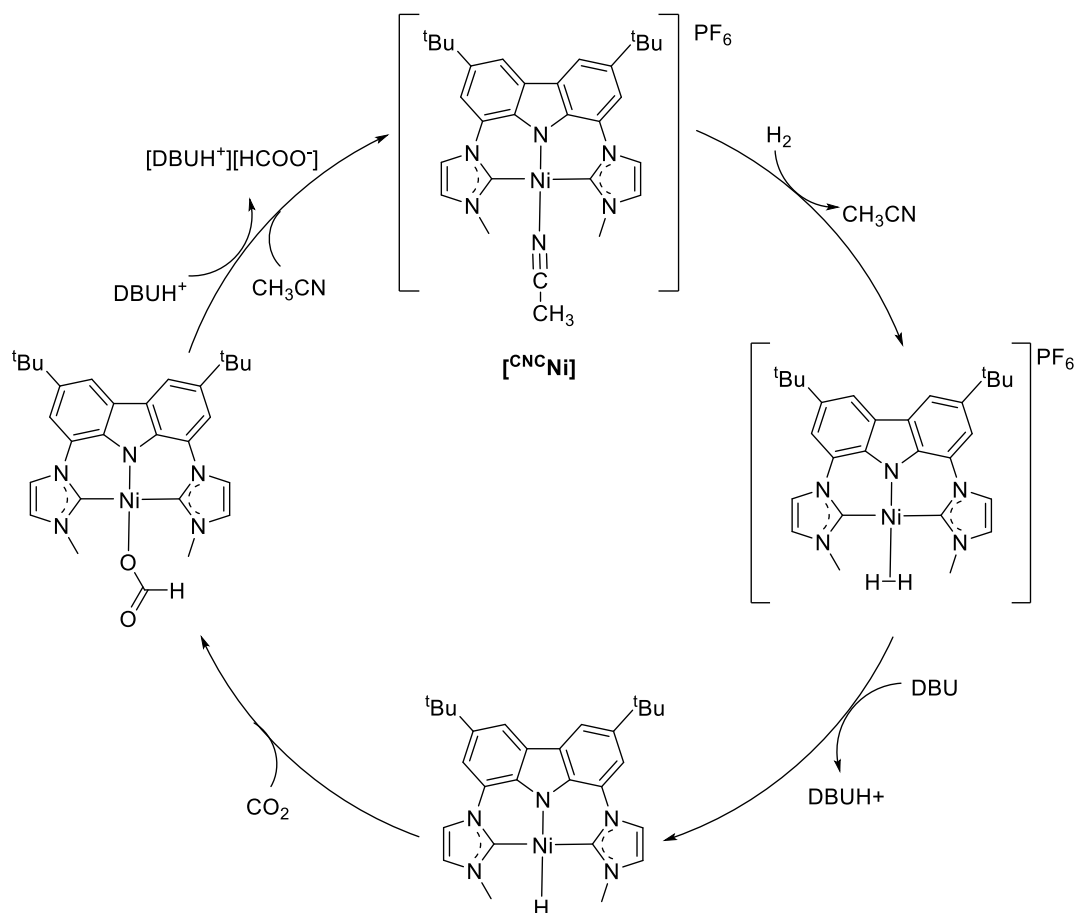

**Figure S14.** Plausible catalytic cycle for the CO<sub>2</sub> hydrogenation reaction using [CNCNi].

#### V. References

- S1. N. Sinha, B. Pfund, C. Wegeberg, A. Prescimone and O. S. Wenger, *J. Am. Chem. Soc.*, 2022, **144**, 9859-9873.
- S2. M. Moser, B. Wucher, D. Kunz and F. Rominger, *Organometallics*, 2007, **26**, 1024-1030.
- S3. T.-Y. Lee, Y.-J. Lin, Y.-Z. Chang, L.-S. Huang, B.-T. Ko and J.-H. Huang, *Organometallics*, 2017, **36**, 291-297.
- S4. S. Enthaler, A. Brück, A. Kammer, H. Junge, E. Irran and S. Gülak, *ChemCatChem*, 2015, **7**, 65-69.
- S5. S. A. Burgess, A. J. Kendall, D. R. Tyler, J. C. Linehan and A. M. Appel, *ACS Catal.*, 2017, **7**, 3089-3096.
